# Supplementary material
Source: PubMed Central journal article supplement (PMC534745)

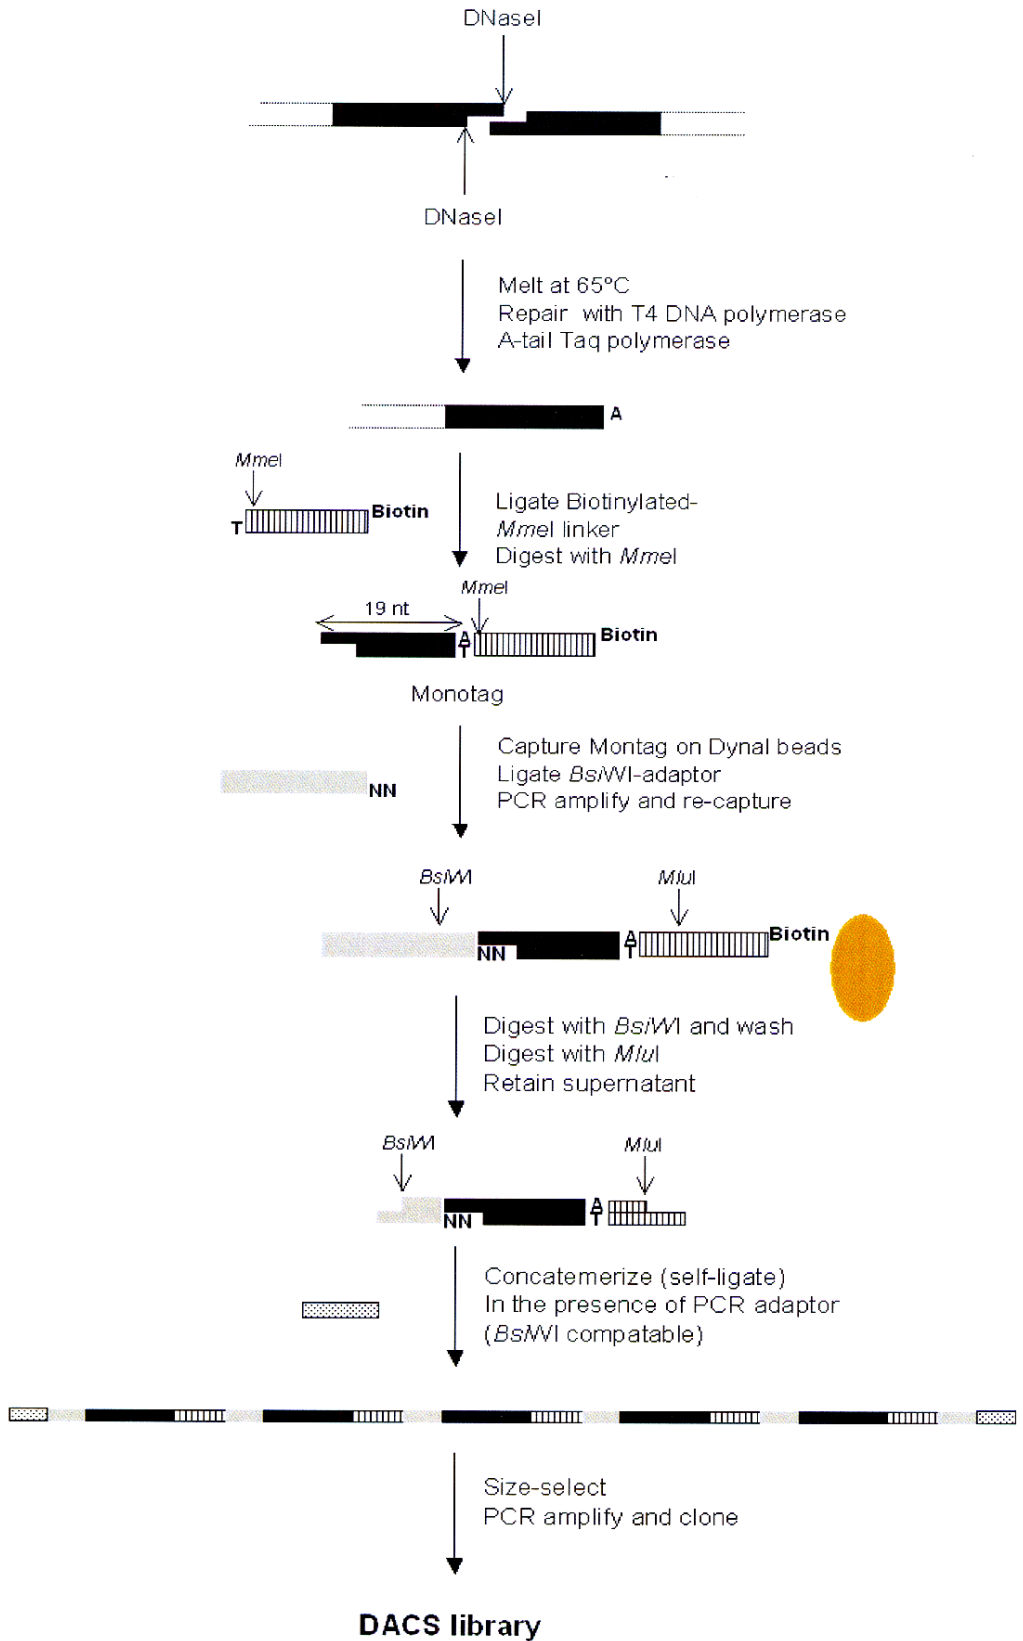

Supplement: pnas_101_48_16837__1.pdf [file pnas_101_48_16837__1.pdf]

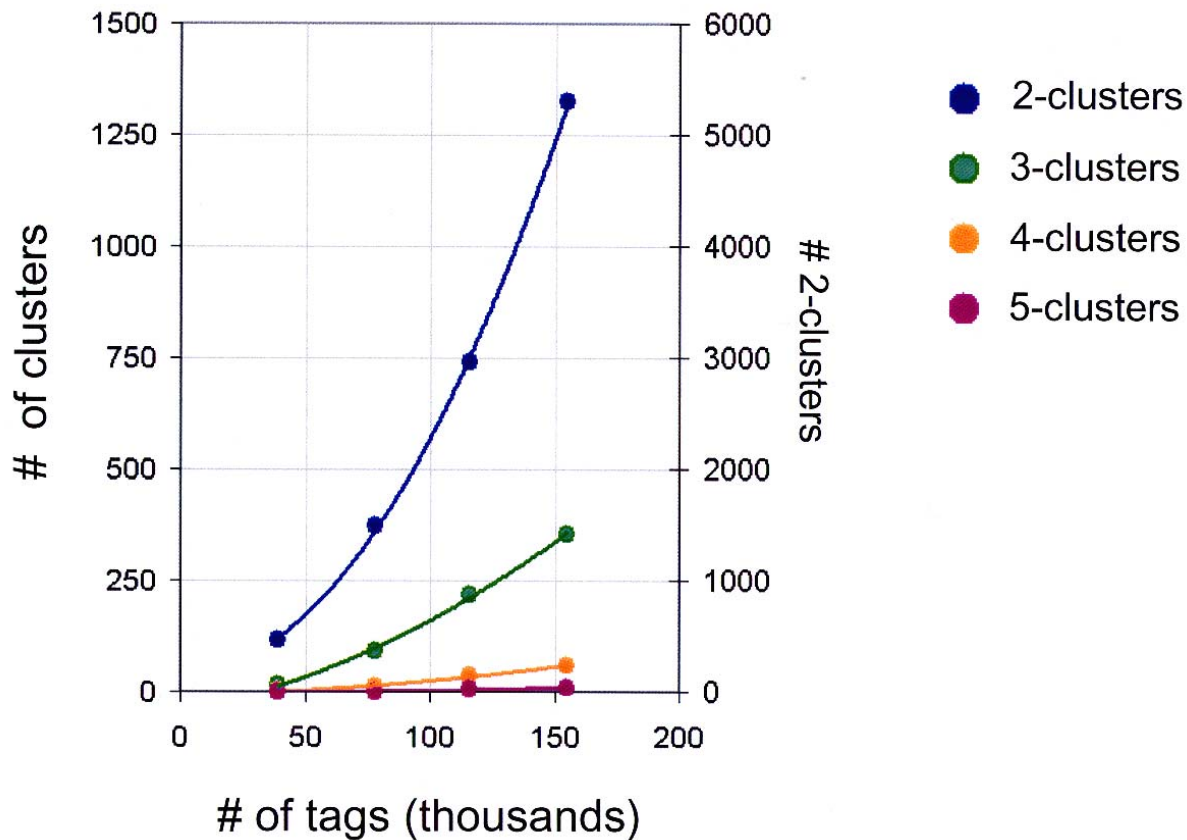

Supplement: pnas_101_48_16837__3.pdf [file pnas_101_48_16837__3.pdf]

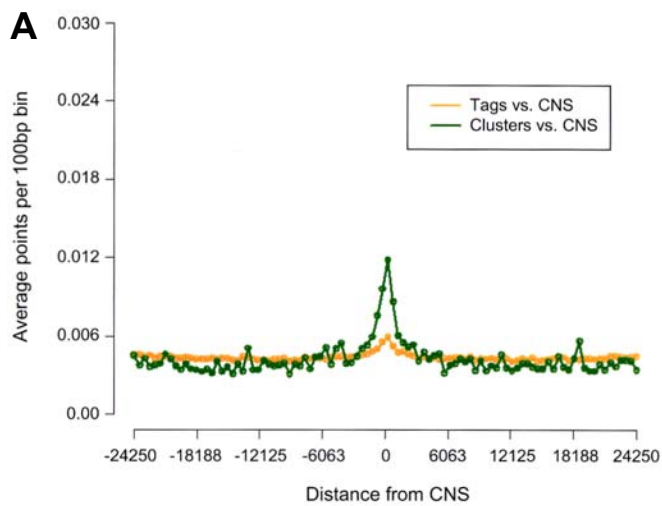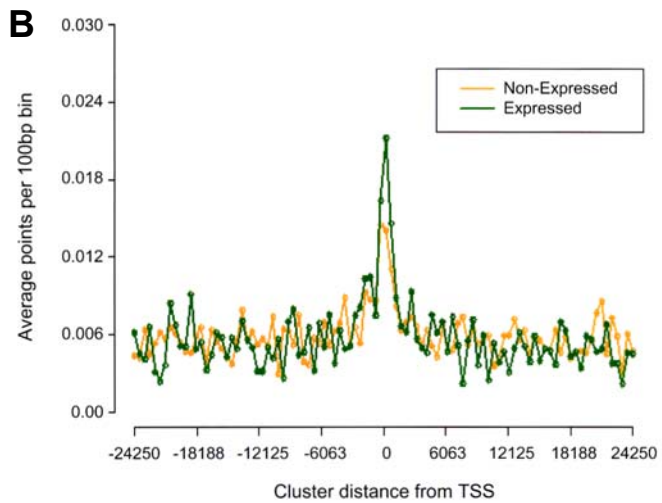

Supplement: pnas_101_48_16837__4.pdf [file pnas_101_48_16837__4.pdf]
